# Supplementary material
Source: HighWire-hosted journal article supplement (https://bmjopen.bmj.com/content/10/1/e029642)
Supplement: inline-supplementary-material-1 [file inline-supplementary-material-1.pdf]

## SUPPLEMENTARY INFORMATION

**Table 1. Clinical trials of cancer immunotherapy using NK cells.**

| Identifier/Reference                | Status: Active/Completed             | Title                                                                                                                                                                                                                                            | Disease                                                                                                           | IMP (IMP: Investigational Medicinal Product Dossier)           | Dose /number of doses                                                                 | Administration route | Number of patients recruited/estimated | Publications                   | Safety and efficacy results    |
|-------------------------------------|--------------------------------------|--------------------------------------------------------------------------------------------------------------------------------------------------------------------------------------------------------------------------------------------------|-------------------------------------------------------------------------------------------------------------------|----------------------------------------------------------------|---------------------------------------------------------------------------------------|----------------------|----------------------------------------|--------------------------------|--------------------------------|
| Krause et al. Clin Cancer Res, 2004 | Completed. Phase I                   | Treatment of colon and lung cancer patients with ex-vivo heat shock protein 70-peptide- activated, autologous natural killer cells: a clinical phase I trial.                                                                                    | Metastatic colorectal cancer and nonsmall cell lung cancer.                                                       | Autologous NK cells from mononuclear cells of peripheral blood | (0.001-0.3) x10 <sup>7</sup> cells/dose. From 1 to 4 doses/cycle, from 1 to 6 cycles. | Intravenous          | 12                                     |                                | No significant toxicity.       |
| Park et al. Clin Cancer Res, 2011   | Completed. Phase I                   | Adoptive transfer of autologous natural killer cells leads to high levels of circulating natural killer cells but does not mediate tumour regression.                                                                                            | Metastatic melanoma, metastatic renal cell carcinoma.                                                             | Autologous NK cells from mononuclear cells of peripheral blood | (4.70 ±2.10) x10 <sup>10</sup> cells                                                  | Intravenous          | 8                                      |                                | No significant toxicity.       |
| NCT00717184                         | Completed. Phase I                   | A Pilot Study of Autologous Ex Vivo Activated NK Cell Infusion in the Treatment of Metastatic Nasopharyngeal Carcinoma                                                                                                                           | Metastatic nasopharyngeal cancer                                                                                  | Autologous NK cells from mononuclear cells of peripheral blood |                                                                                       | Intravenous          |                                        | There are no published results | There are no published results |
| NCT00720785                         | Active. Recruiting patients. Phase I | Safety and the Anti-Tumour Effects of Escalating Doses of Adoptively Infused Ex Vivo Expanded Autologous Natural Killer (NK) Cells Against Metastatic Cancers or Hematological Malignancies Sensitized to NK TRAIL. Cytotoxicity with Bortezomib | Metastatic tumours. Hematologic malignancies.                                                                     | Autologous NK cells from mononuclear cells of peripheral blood |                                                                                       | Intravenous          |                                        | There are no published results | There are no published results |
| NCT00909558                         | Suspended. Phase I                   | A Phase I Open Label, Single Site, Safety and Efficacy Study of the Effects of Autologous Natural Killer and Natural Killer T Cell Immunotherapy on Malignant Disease                                                                            | Breast cancer, Hepatocellular cancer, squamous cell lung cancer, pancreatic cancer, colon cancer, prostate cancer | Autologous NK cells from mononuclear cells of peripheral blood |                                                                                       | Intravenous          | 24                                     | There are no published results | There are no published results |

|                                                  |                    |                                                                                                                                                                                                               |                                               |                                                                 |                                                            |             |    |                                                                                                                                                                                                                                                                                                                                                                  |                                                                                                                      |
|--------------------------------------------------|--------------------|---------------------------------------------------------------------------------------------------------------------------------------------------------------------------------------------------------------|-----------------------------------------------|-----------------------------------------------------------------|------------------------------------------------------------|-------------|----|------------------------------------------------------------------------------------------------------------------------------------------------------------------------------------------------------------------------------------------------------------------------------------------------------------------------------------------------------------------|----------------------------------------------------------------------------------------------------------------------|
| Iliopoulou et al. Cancer Immunol Immunother 2010 |                    | A phase I trial of adoptive transfer of allogenic natural killer cells in patients with advanced non-small cell lung cancer.                                                                                  | Advanced stage nonsmall cell lung cancer      | Allogeneic NK cells from mononuclear cells of peripheral blood. | (0.2-29) x10 <sup>6</sup> cells/kg/dose. From 2 to 4 doses | Intravenous | 15 |                                                                                                                                                                                                                                                                                                                                                                  | Clinically effective. No significant toxicity.                                                                       |
| NCT00187096                                      | Completed. Phase I | Pilot Study of Haplo-Identical Natural Killer Cell Transplantation for Acute Myeloid Leukemia                                                                                                                 | Acute myeloid leukemia                        | Allogeneic NK cells from mononuclear cells of peripheral blood. |                                                            | Intravenous | 49 | Rubnitz JE, Inaba H, Ribeiro RC, Pounds S, Rooney B, Bell T, Pui CH, Leung W. NKAML: a pilot study to determine the safety and feasibility of haploidentical natural killer cell transplantation in childhood acute myeloid leukemia. J Clin Oncol. 2010 Feb 20;28(6):955-9                                                                                      | Successful graft. The nonhematologic toxicity was not significant. There were no cases of graft-versus-host disease. |
| NCT00383994                                      | Completed. Phase I | Immunotherapy with NK Cell, Rituximab and Rhu-GMCSF in Non-Myeloablative Allogeneic Stem Cell Transplantation                                                                                                 | Lymphoma, leukemia, stem cell transplantation | Allogeneic NK cells from mononuclear cells of peripheral blood. |                                                            | Intravenous | 6  | There are no published results                                                                                                                                                                                                                                                                                                                                   | There are no published results                                                                                       |
| NCT00586690                                      | Completed. Phase I | Safety Trial of Natural Killer (NK) Cell Donor Lymphocyte Infusions (DLI) From 6/6 Human Leukocyte Antigen (HLA) Matched Family Member Following Nonmyeloablative Allogeneic Stem Cell Transplantation (ASCT) | Lymphoma                                      | Allogeneic NK cells from mononuclear cells of peripheral blood. | 1x10 <sup>7</sup> cells/kg.                                | Intravenous | 47 | Rizzieri DA, Storms R, Chen DF, Long G, Yang Y, Nikcevich DA, Gasparetto C, Horwitz M, Chute J, Sullivan K, Hennig T, Misra D, Apple C, Baker M, Morris A, Green PG, Hasselblad V, Chao NJ. Natural killer cell-enriched donor lymphocyte infusions from A 3-6/6 HLA matched family member following nonmyeloablative allogeneic stem cell transplantation. Biol | Improvement of immunologic recovery. No evidence of toxicity.                                                        |

|             |                    |                                                                                                                                              |                                                                                                                                               |                                                                 |                                 |             |    |                                                                                                                                                                                                                                                                               |                                                                            |
|-------------|--------------------|----------------------------------------------------------------------------------------------------------------------------------------------|-----------------------------------------------------------------------------------------------------------------------------------------------|-----------------------------------------------------------------|---------------------------------|-------------|----|-------------------------------------------------------------------------------------------------------------------------------------------------------------------------------------------------------------------------------------------------------------------------------|----------------------------------------------------------------------------|
|             |                    |                                                                                                                                              |                                                                                                                                               |                                                                 |                                 |             |    | Blood Marrow Transplant. 2010 Aug;16(8):1107-14.                                                                                                                                                                                                                              |                                                                            |
| NCT00640796 | Completed. Phase I | Pilot Study of Expanded, Activated Haploidentical Natural Killer Cell Infusions for Non-B Lineage Hematologic Malignancies and Solid Tumours | Acute myeloid leukemia. Acute lymphocytic leukemia. Juvenile T-cell myelomonocytic leukemia. Lymphoblastic lymphoma. Myelodysplastic syndrome | Allogeneic NK cells from mononuclear cells of peripheral blood. |                                 | Intravenous | 22 | There are no published results                                                                                                                                                                                                                                                | There are no published results                                             |
| NCT00660166 | Completed. Phase I | HLA Class I Haplotype Mismatched Natural Killer Cell Infusions After Autologous Stem Cell Transplant for Hematological Malignancies          | Lymphoma, myeloma, leukemia.                                                                                                                  | Allogeneic NK cells from mononuclear cells of peripheral blood. |                                 | Intravenous | 13 | There are no published results                                                                                                                                                                                                                                                | There are no published results                                             |
| NCT00697671 | Completed. Phase I | Pilot Study of Haploidentical Natural Killer Cell Infusions for Poor Prognosis Non-AML Hematologic Malignancies                              | Acute lymphoblastic leukemia, Chronic myeloid leukemia, Juvenile myelomonocytic leukemia, myelodysplastic syndrome, non-Hodgkin's lymphoma.   | Allogeneic NK cells from mononuclear cells of peripheral blood. |                                 | Intravenous | 48 | There are no published results                                                                                                                                                                                                                                                | There are no published results                                             |
| NCT00799799 | Unknown. Phase I   | Adoptive Immunotherapy of High Risk Acute Myeloblastic Leukemia Patients Using Haploidentical KIR Ligand-mismatched Natural Killer Cells     | Acute myeloid leukemia                                                                                                                        | Allogeneic NK cells from mononuclear cells of peripheral blood. | (1-5) x10 <sup>6</sup> cells/kg | Intravenous | 13 | Curti A, Ruggeri L, D'Addio A, Bontadini A, Dan E, Motta MR, Trabanelli S, Giudice V, Urbani E, Martinelli G, Paolini S, Fruet F, Isidori A, Parisi S, Bandini G, Baccarani M, Velardi A, Lemoli RM. Successful transfer of alloreactive haploidentical KIR ligand-mismatched | No evidence of toxicity. There were no cases of graft-versus-host disease. |

|             |                                      |                                                                                                                                                                                                  |                                             |                                                                 |                                                                                                                                                                                                                                          |             |    |                                                                                                                                      |                                |
|-------------|--------------------------------------|--------------------------------------------------------------------------------------------------------------------------------------------------------------------------------------------------|---------------------------------------------|-----------------------------------------------------------------|------------------------------------------------------------------------------------------------------------------------------------------------------------------------------------------------------------------------------------------|-------------|----|--------------------------------------------------------------------------------------------------------------------------------------|--------------------------------|
|             |                                      |                                                                                                                                                                                                  |                                             |                                                                 |                                                                                                                                                                                                                                          |             |    | natural killer cells after infusion in elderly high risk acute myeloid leukemia patients. <i>Blood</i> . 2011 Sep 22;118(12):3273-9. |                                |
| NCT00877110 | Active. Phase I                      | Phase I Study of Anti-GD2 3F8 Antibody and Allogeneic Natural Killer Cells for High-Risk Neuroblastoma                                                                                           | Neuroblastoma                               | Allogeneic NK cells from mononuclear cells of peripheral blood. |                                                                                                                                                                                                                                          | Intravenous | 72 | There are no published results                                                                                                       | There are no published results |
| NCT00995137 | Completed. Phase I                   | Pilot Study of Genetically Modified Haploidentical Natural Killer Cell Infusions for B-Lineage Acute Lymphoblastic Leukemia                                                                      | Acute lymphoblastic leukemia                | Allogeneic NK cells from mononuclear cells of peripheral blood. |                                                                                                                                                                                                                                          | Intravenous | 14 | There are no published results                                                                                                       | There are no published results |
| NCT01212341 | Completed. Phase I                   | A Phase I Study of Allogeneic NK Cell Therapy in Patients with Refractory/Relapsed Lymphoma or Solid Tumour                                                                                      | Lymphomas, solid tumours                    | Allogeneic NK cells from mononuclear cells of peripheral blood. | Infusion of single dose: Cohort 1: $1 \times 10^6$ cells/kg; Cohort 2: $1 \times 10^7$ cells/kg; Infusion of multiple doses: Cohort 3: $1 \times 10^6$ cells/kg; Cohort 5: $1 \times 10^7$ cells/kg; Cohort 6: $3 \times 10^7$ cells/kg. | Intravenous | 18 | There are no published results                                                                                                       | There are no published results |
| NCT01287104 | Active. Recruiting patients. Phase I | A Phase I Study of NK Cell Infusion Following Allogeneic Peripheral Blood Stem Cell Transplantation from Related or Matched Unrelated Donors in Pediatric Patients with Hematologic Malignancies | Leukemia, Lymphoma, neuroblastoma, sarcoma, | Allogeneic NK cells from mononuclear cells of peripheral blood. | $1 \times 10^5$ cells/kg<br>$1 \times 10^6$ cells/kg<br>$1 \times 10^7$ cells/kg                                                                                                                                                         | Intravenous | 86 | There are no published results                                                                                                       | There are no published results |

|             |                                 |                                                                                                                                                                                                                                                                |                              |                                                                 |                                                                                                                |             |    |                                |                                |
|-------------|---------------------------------|----------------------------------------------------------------------------------------------------------------------------------------------------------------------------------------------------------------------------------------------------------------|------------------------------|-----------------------------------------------------------------|----------------------------------------------------------------------------------------------------------------|-------------|----|--------------------------------|--------------------------------|
| NCT01576692 | Active. Not recruiting. Phase I | A Safety/Feasibility Trial of the Addition of the Humanized Anti-GD2 Antibody (hu14.18K322A) With and Without Natural Killer Cells to Chemotherapy in Children and Adolescents with Recurrent/Refractory Neuroblastoma.                                        | Neuroblastoma                | Allogeneic NK cells from mononuclear cells of peripheral blood. | Minimum: $0.1 \times 10^6$ cells/kg.<br>Maximum: $400 \times 10^6$ CD45 <sup>+</sup> cells/kg, in single dose. | Intravenous | 20 | There are no published results | There are no published results |
| NCT01619761 | Active. Phase I                 | Natural Killer Cells in Allogeneic Cord Blood Transplantation                                                                                                                                                                                                  | Chronic lymphocytic leukemia | Allogeneic NK cells from mononuclear cells of peripheral blood. | $(3-7) \times 10^8$ cells.                                                                                     | Intravenous | 13 | There are no published results | There are no published results |
| NCT00303667 | Completed. Phase I/II           | Reduced Intensity Haploidentical Hematopoietic Stem Cell Transplantation (HSCT) Supplemented with Donor Natural Killer (NK) Cell Infusions in Patients with High Risk Myeloid Malignancies Who Are Unsuited for Fully Myeloablative Transplantation            | Acute myeloid leukemia       | Allogeneic NK cells from mononuclear cells of peripheral blood. | $(2-3) \times 10^7$ cells/kg                                                                                   | Intravenous | 50 | There are no published results | There are no published results |
| NCT00625729 | Completed. Phase I/II           | MT2007-12 Allogeneic Natural Killer Cells with Rituximab in Patients with CD20 Positive Relapsed Non-Hodgkin Lymphoma or Chronic Lymphocytic Leukemia. Strategies to Increase Sensitivity of CLL Tumour Cells to Natural Killer Cell-Immune-Mediated Cytolysis | Lymphoma. Leukemia           | Allogeneic NK cells from mononuclear cells of peripheral blood. | $(1.5-8) \times 10^7$ NK cells/kg                                                                              | Intravenous | 6  | There are no published results | There are no published results |

|             |                                         |                                                                                                                                                                                                                                                                                |                                                                                                                                                                                                   |                                                                 |                                                                                                                                                                                             |             |    |                                |                                |
|-------------|-----------------------------------------|--------------------------------------------------------------------------------------------------------------------------------------------------------------------------------------------------------------------------------------------------------------------------------|---------------------------------------------------------------------------------------------------------------------------------------------------------------------------------------------------|-----------------------------------------------------------------|---------------------------------------------------------------------------------------------------------------------------------------------------------------------------------------------|-------------|----|--------------------------------|--------------------------------|
| NCT00823524 | Completed. Phase I/II                   | Donor NK Cell Infusion for Progression/Recurrence of Underlying Malignant Disorders After HLA-haploidentical HCT - a Phase 1-2 Study                                                                                                                                           | Central nervous system tumours. Chronic myeloproliferative disorders. Leukemia. Lymphoma. Lymphoproliferative disorder. Multiple myeloma. Myeloproliferative/ myelodysplastic neoplasia syndromes | Allogeneic NK cells from mononuclear cells of peripheral blood. |                                                                                                                                                                                             | Intravenous | 47 | There are no published results | There are no published results |
| NCT00846833 | Completed. Phase I/II                   | Phase I/II Study of Haploidentical Natural Killer Cell Infusion in Patients with Refractory or Relapsed Malignant Melanoma                                                                                                                                                     | Melanoma                                                                                                                                                                                          | Allogeneic NK cells from mononuclear cells of peripheral blood. |                                                                                                                                                                                             | Intravenous | 12 | There are no published results | There are no published results |
| NCT01040026 | Active. Recruiting patients. Phase I/II | A Phase I/II Single Center Study to Assess Tolerability and Feasibility of Infusions of Allogeneic Expanded Haploidentical Natural Killer (NK) Cells in Patients Treated with High Dose Melphalan Chemotherapy and Autologous Stem Cell Transplantation for a Multiple Myeloma | Multiple myeloma                                                                                                                                                                                  | Allogeneic NK cells from mononuclear cells of peripheral blood. | ( $1.5 \times 10^6$ cells/kg; $1.5 \times 10^7$ cells/kg and $1 \times 10^8$ cells/kg); if the doses are safe, the therapy continues with a maximum of 7 doses of $1 \times 10^8$ cells/kg. | Intravenous | 10 | There are no published results | There are no published results |
| NCT01220544 | Unknown                                 | Transplantation of Hematopoietic Stem Cells and Infusion of CD56+CD3- NK Cells from Haploidentical Donors for Patients with Hematological Malignancies                                                                                                                         | Acute myeloid leukemias. Advanced hematologic neoplasms. Indication for allogeneic stem cell transplantation without HLA-identical donor available.                                               | Allogeneic NK cells from mononuclear cells of peripheral blood. | $1 \times 10^7$ cells/kg                                                                                                                                                                    | Intravenous | 30 | There are no published results | There are no published results |

|             |                                                |                                                                                                                                                             |                                                                                               |                                                                 |                                                          |             |    |                                                                                                                                                                                                                                                                                                                                      |                                                                                                                                                                                                                                                                                                                                                                                           |
|-------------|------------------------------------------------|-------------------------------------------------------------------------------------------------------------------------------------------------------------|-----------------------------------------------------------------------------------------------|-----------------------------------------------------------------|----------------------------------------------------------|-------------|----|--------------------------------------------------------------------------------------------------------------------------------------------------------------------------------------------------------------------------------------------------------------------------------------------------------------------------------------|-------------------------------------------------------------------------------------------------------------------------------------------------------------------------------------------------------------------------------------------------------------------------------------------------------------------------------------------------------------------------------------------|
| NCT01337544 | Completed. Phase I/II                          | Haploidentical Stem Cell Transplantation and IL-15 NK Cell Infusion for Paediatric Refractory Solid Tumours                                                 | Pediatric solid tumours                                                                       | Allogeneic NK cells from mononuclear cells of peripheral blood. |                                                          | Intravenous | 6  | Pérez-Martínez A, de Prada Vicente I, Fernández L, González-Vicent M, Valentín J, Martín R, Maxwell H, Sevilla J, Vicario JL, Díaz MÁ. Natural killer cells can exert a graft-vs-tumour effect in haploidentical stem cell transplantation for pediatric solid tumours.                                                              | Beneficial effect of haploidentical stem cells transplantation in refractory solid tumours. Safety: 50% of the patients (3 of 6) developed acute degree I-II GVHD. One patient developed severe acute GVHD. Two patients developed chronic GVHD. One patient died due to acute severe intestinal GVHD.                                                                                    |
| NCT01386619 | Active but not recruiting patients. Phase I/II | Natural Killer Cell Selected T-cell Depleted Donor Lymphocyte Infusions (NK-DLI) in Patients After HLA-haploidentical Allogeneic Stem Cell Transplantation  | Acute myeloid leukemia, myelodysplastic syndromes, lymphoma, neuroblastoma, rhabdomyosarcoma. | Allogeneic NK cells from mononuclear cells of peripheral blood. | $\geq 1 \times 10^7$ NK cells/kg                         | Intravenous | 15 | Stern M, Passweg JR, Meyer-Monard S, Esser R, Tonn T, Soerensen J, Paulussen M, Gratwohl A, Klingebiel T, Bader P, Tichelli A, Schwabe D, Koehl U. Pre-emptive immunotherapy with purified natural killer cells after haploidentical SCT: a prospective phase II study in two centers. Bone Marrow Transplant. 2013 Mar;48(3):433-8. | When compared with the historic controls, infusions of NK cells had no apparent effect on the graft failure rates or relapse. The adoptive transfer of allogeneic NK cells is safe and feasible, but more studies are needed to determine the optimal dosage and moment for the NK cell therapy. Moreover, NK cell activation/expansion might be necessary to achieve a clinical benefit. |
| NCT01520558 | Active. Recruiting patients. Phase I/II        | A Phase 1/2 Study of CND0-109-Activated Allogeneic Natural Killer Cells in Patients with High Risk Acute Myeloid Leukemia in First Complete Remission (CR1) | Acute myeloid leukemia.                                                                       | Allogeneic NK cells from mononuclear cells of peripheral blood. | $1 \times 10^6$ NK cells/kg or $3 \times 10^5$ cells/kg. | Intravenous | 33 | There are no published results                                                                                                                                                                                                                                                                                                       | There are no published results                                                                                                                                                                                                                                                                                                                                                            |

|                                 |                                           |                                                                                                                                                               |                                                       |                                                                 |                                           |             |    |                                                                                                                                                                                                                                                                                                                                   |                                                                                                           |
|---------------------------------|-------------------------------------------|---------------------------------------------------------------------------------------------------------------------------------------------------------------|-------------------------------------------------------|-----------------------------------------------------------------|-------------------------------------------|-------------|----|-----------------------------------------------------------------------------------------------------------------------------------------------------------------------------------------------------------------------------------------------------------------------------------------------------------------------------------|-----------------------------------------------------------------------------------------------------------|
| Geller et al. Cytotherapy. 2011 | Completed. Phase II                       | A phase II study of allogeneic natural killer cell therapy to treat patients with recurrent ovarian and breast cancer.                                        | Ovarian cancer, Breast cancer.                        | Allogeneic NK cells from mononuclear cells of peripheral blood. | (8.33-39.41) x10 <sup>6</sup> NK cells/kg | Intravenous | 20 | Geller MA, Cooley S, Judson PL, Ghebre R, Carson LF, Argenta PA, Jonson AL, Panoskaltis-Mortari A, Curtsinger J, McKenna D, Dusenbery K, Bliss R, Downs LS, Miller JS. A phase II study of allogeneic natural killer cell therapy to treat patients with recurrent ovarian and breast cancer. Cytotherapy. 2011 Jan;13(1):98-107. | Partial response: 4 patients. Stabilization of the disease: 12 patients. Disease progression: 3 patients. |
| NCT00186875                     | Active. Not recruiting patients. Phase II | A Study of Therapy for Pediatric Relapsed or Refractory Acute Lymphoblastic Leukemia                                                                          | Acute lymphoblastic leukemia, lymphoma.               | Allogeneic NK cells from mononuclear cells of peripheral blood. |                                           | Intravenous | 47 | There are no published results                                                                                                                                                                                                                                                                                                    | There are no published results                                                                            |
| NCT00328861                     | Completed. Phase II                       | Phase II Study in Metastatic Melanoma or Kidney Cancer Using Autologous Natural Killer Cells Plus Aldesleukin (IL-2) Following a Lymphodepleting Chemotherapy | Metastatic melanoma. Metastatic renal cell carcinoma. | Allogeneic NK cells from mononuclear cells of peripheral blood. |                                           | Intravenous | 8  | There are no published results                                                                                                                                                                                                                                                                                                    | There are no published results                                                                            |
| NCT00376805                     | Completed. Phase II                       | Allogeneic Natural Killer Cells in Patients with Advanced Metastatic Breast Cancer                                                                            | Breast cancer                                         | Allogeneic NK cells from mononuclear cells of peripheral blood. | (1.5-8.0) x10 <sup>7</sup> NK cells/kg    | Intravenous | 6  | There are no published results                                                                                                                                                                                                                                                                                                    | There are no published results                                                                            |



|             |                     |                                                                                                                                                                            |                                                           |                                                                 |                                        |             |    |                                |                                                              |
|-------------|---------------------|----------------------------------------------------------------------------------------------------------------------------------------------------------------------------|-----------------------------------------------------------|-----------------------------------------------------------------|----------------------------------------|-------------|----|--------------------------------|--------------------------------------------------------------|
| NCT00526292 | Completed. Phase II | Phase II Trial of HLA Haploidentical Natural Killer Cell Infusion for Treatment of Relapsed or Persistent Leukemia Following Allogeneic Hematopoietic Stem Cell Transplant | Leukemia, myelodysplastic syndromes                       | Allogeneic NK cells from mononuclear cells of peripheral blood. |                                        | Intravenous | 12 | There are no published results | There are no published results                               |
| NCT00652899 | Completed. Phase II | MT2007-19R: WCC #53 Allogeneic Natural Killer Cells in Patients with Recurrent Ovarian Cancer, Fallopian Tube, and Primary Peritoneal Cancer                               | Fallopian tube cancer, ovarian cancer, peritoneal cancer. | Allogeneic NK cells from mononuclear cells of peripheral blood. | (1.5-8.1) x10 <sup>7</sup> NK cells/kg | Intravenous | 14 | There are no publications.     | Safety analysis: SAEs were reported in 9 of the 14 patients. |
| NCT00698009 | Completed. Phase II | Study to Infuse Haploidentical Natural Killer Cells in Patients with Relapsed or Refractory Neuroblastoma                                                                  | Neuroblastoma                                             | Allogeneic NK cells from mononuclear cells of peripheral blood. |                                        | Intravenous | 1  | There are no publications.     | There are no publications.                                   |
| NCT00941928 | Completed. Phase II | Adoptive Transfer of Haploidentical NK Cells in Combination with Epratuzumab for the Treatment of Relapsed Acute Lymphoblastic Leukemia                                    | Leukemia, pediatric tumours                               | Allogeneic NK cells from mononuclear cells of peripheral blood. |                                        | Intravenous | 2  | There are no publications.     | There are no publications.                                   |

|             |                                       |                                                                                                                                                                                                                                          |                                                                                  |                                                                 |                                           |             |    |                                                                                                                                                                                                                                                                                                                                                |                                                                                                                                                                                                                                                                                                     |
|-------------|---------------------------------------|------------------------------------------------------------------------------------------------------------------------------------------------------------------------------------------------------------------------------------------|----------------------------------------------------------------------------------|-----------------------------------------------------------------|-------------------------------------------|-------------|----|------------------------------------------------------------------------------------------------------------------------------------------------------------------------------------------------------------------------------------------------------------------------------------------------------------------------------------------------|-----------------------------------------------------------------------------------------------------------------------------------------------------------------------------------------------------------------------------------------------------------------------------------------------------|
| NCT01105650 | Completed. Phase II                   | Lymphodepleting Chemotherapy and T-Cell Suppression Followed by Allogeneic Natural Killer Cells and IL-2 in Patients with Recurrent Ovarian, Fallopian Tube, Primary Peritoneal Cancer and Advanced Metastatic Breast Cancer (MT2009-30) | Fallopian tube cancer, ovarian cancer, primary peritoneal cancer, breast cancer. | Allogeneic NK cells from mononuclear cells of peripheral blood. | $8.0 \times 10^7$ cells/kg                | Intravenous | 13 | There are no publications.                                                                                                                                                                                                                                                                                                                     | There are no publications.                                                                                                                                                                                                                                                                          |
| NCT01106950 | Completed. Phase II                   | Adoptive Transfer of Haploidentical Natural Killer Cells to Treat Refractory or Relapsed AML MT2010-02                                                                                                                                   | Acute myeloid leukemia                                                           | Allogeneic NK cells from mononuclear cells of peripheral blood. | $\leq 8.0 \times 10^7$ nucleated cells/kg | Intravenous | 15 | Bachanova V, Cooley S, Defor TE, Verneris MR, Zhang B, McKenna DH, Curtsinger J, Panoskaltis-Mortari A, Lewis D, Hippen K, McGlave P, Weisdorf DJ, Blazar BR, Miller JS. Clearance of acute myeloid leukemia by haploidentical natural killer cells is improved using IL-2 diphtheria toxin fusion protein. Blood. 2014 Jun 19;123(25):3855-63 | Efficacy: 53% of the patients showed full remission of the disease. 33% showed disease-free survival evaluated at 6 months after completing the therapy. Safety: 12 of the 15 patients had an SAE, 33% due to hematological abnormalities. In terms of AEs, 100% had grade I pulmonary infiltrates. |
| NCT01181258 | Active. Recruiting patients. Phase II | Lymphodepleting Chemotherapy with Rituximab and Allogeneic Natural Killer Cells for Patients with Refractory Lymphoid Malignancies (MT2009-15)                                                                                           | Non-Hodgkin's lymphoma, Chronic lymphocytic leukemia.                            | Allogeneic NK cells from mononuclear cells of peripheral blood. | $(1.5-8.0) \times 10^7$ cells/kg          | Intravenous | 34 | There are no publications.                                                                                                                                                                                                                                                                                                                     | There are no publications.                                                                                                                                                                                                                                                                          |
| NCT01370213 | Active. Recruiting patients. Phase II | Multi-Center Phase II Trial of NK Cell Based Non-Myeloablative Haploidentical Transplantation for Patients with High-Risk Acute Myeloid Diseases                                                                                         | Acute myeloid leukemia, myelodysplastic syndrome                                 | Allogeneic NK cells from mononuclear cells of peripheral blood. |                                           | Intravenous | 43 | There are no publications.                                                                                                                                                                                                                                                                                                                     | There are no publications.                                                                                                                                                                                                                                                                          |

|                |                                           |                                                                                                                                                                      |                                                                                        |                                                                            |                             |             |    |                            |                            |
|----------------|-------------------------------------------|----------------------------------------------------------------------------------------------------------------------------------------------------------------------|----------------------------------------------------------------------------------------|----------------------------------------------------------------------------|-----------------------------|-------------|----|----------------------------|----------------------------|
| NCT01390402    | Completed. Phase II                       | Natural Killer (NK) Cells and Nonmyeloablative Stem Cell Transplantation for Chronic Myelogenous Leukemia (CML)                                                      | Leukemia, chronic myeloid leukemia                                                     | Allogeneic NK cells from mononuclear cells of peripheral blood.            |                             | Intravenous | 6  | There are no publications. | There are no publications. |
| NCT01593670    | Active. Not recruiting patients. Phase II | Decitabine and Vorinostat With CD3/CD19 Depleted Haploidentical Donor Natural Killer (NK) Cells for the Treatment of High-Risk Myelodysplastic Syndromes (MDS)       | Myelodysplastic syndrome                                                               | Allogeneic NK cells from mononuclear cells of peripheral blood.            |                             | Intravenous | 46 | There are no publications. | There are no publications. |
| 2013-003421-28 | Active. Phase II                          | Randomised controlled phase-2 trial to determine the efficacy of adoptive immunotherapy with haploidentical natural killer cells in high-risk acute myeloid leukemia | Recently diagnosed high-risk AML and acute promyelocytic leukemia, ≥20% of blast cells | NK cells-CD3 negative / CD56-positive of HLA-haploidentical family donors. |                             | Intravenous | 56 | There are no publications. | There are no publications. |
| 2011-001514-34 | Active.                                   | Infusion of IL-15 activated NK cells after allogeneic stem cell transplantation in children transplanted for relapsed/refractory leukemia: a feasibility study       | Acute leukemia in relapse                                                              | NK cells activated with IL-15                                              | 10x10 <sup>6</sup> cells/kg | Intravenous | 12 | There are no publications. | There are no publications. |

|                |           |                                                                                                                                                                                                     |                                                     |                                                                                                                  |             |             |    |                                                                                                                                                                                                                                                                                                                                                                                                                          |                                                                                                                                                                                                                                                                                                                                                                                                                                                            |
|----------------|-----------|-----------------------------------------------------------------------------------------------------------------------------------------------------------------------------------------------------|-----------------------------------------------------|------------------------------------------------------------------------------------------------------------------|-------------|-------------|----|--------------------------------------------------------------------------------------------------------------------------------------------------------------------------------------------------------------------------------------------------------------------------------------------------------------------------------------------------------------------------------------------------------------------------|------------------------------------------------------------------------------------------------------------------------------------------------------------------------------------------------------------------------------------------------------------------------------------------------------------------------------------------------------------------------------------------------------------------------------------------------------------|
| 2011-003181-32 | Completed | In vivo expansion and efficacy of adoptive natural killer cell-based immunotherapy for high-risk myeloid diseases                                                                                   | Acute myeloid leukemia and myelodysplastic syndrome | Activated NK cells                                                                                               |             | Intravenous | 12 | Björklund AT, Carlsten M, Sohlberg E, Liu LL, Clancy T, Karimi M, Cooley S, Miller JS7, Klimkowska M8, Schaffer M2, Watz E9, Wikström K10, Blomberg P10,11, Wahlin BE, Palma M, Hansson L, Ljungman P, Hellström-Lindberg E, Ljunggren HG, Malmberg KJ. Complete Remission with Reduction of High-Risk Clones following Haploidentical NK-Cell Therapy against MDS and AML. Clin Cancer Res. 2018 Apr 15;24(8):1834-1844 | Efficacy: Six patients achieved objective responses with complete remission (CR), marrow CR, or partial remission (PR). Five patients proceeded to allogeneic hematopoietic stem cell transplantation (HSCT). Three patients are still free from disease >3 years after treatment.<br><br>Safety: The NK-cell infusions were well tolerated with transient (<6 hours) grade 3-4 toxicities, including chills and nausea, observed in 2 out of 16 patients. |
| 2012-005146-38 | Active.   | "LANK-2": IMMUNOTHERAPY WITH ACTIVATED AND EXPANDED NATURAL KILLER CELLS ALONG WITH SALVAGE CHEMOTHERAPY IN CHILDREN, ADOLESCENTS AND YOUNG ADULTS WITH ACUTE LEUKEMIA IN RELAPSE OR REFRACTORINESS | ACUTE LEUKEMIA IN RELAPSE OR REFRACTORINESS         | Haploidentical allogeneic adult differentiated NK cells from peripheral blood, expanded and activated with IL-15 |             | Intravenous | 10 | There are no publications.                                                                                                                                                                                                                                                                                                                                                                                               | There are no publications.                                                                                                                                                                                                                                                                                                                                                                                                                                 |
| 2012-000054-63 | Active    | Salvage therapy with chemotherapy and Natural Killer cells in relapsed/refractory paediatric T cell lymphoblastic leukaemia and lymphoma.                                                           | REFRACTORY LEUKEMIA/T LYMPHOMA in children          | NK cells                                                                                                         | ≥50,000,000 | Intravenous | 16 | There are no publications.                                                                                                                                                                                                                                                                                                                                                                                               | There are no publications.                                                                                                                                                                                                                                                                                                                                                                                                                                 |
